# Supplementary material for: Identification of Novel Mitochondrial Pyruvate Carrier Inhibitors by Homology Modeling and Pharmacophore-Based Virtual Screening
Source: MDPI journal article supplement (doi:10.3390/biomedicines10020365), 2022-02-02
Supplement: s1 [file s1]

MPC1: - WT WT H84A WT WT F66A N33A  
MPC2: - WT N100A WT W82A K49A WT WT

Full blot images for Figure 3

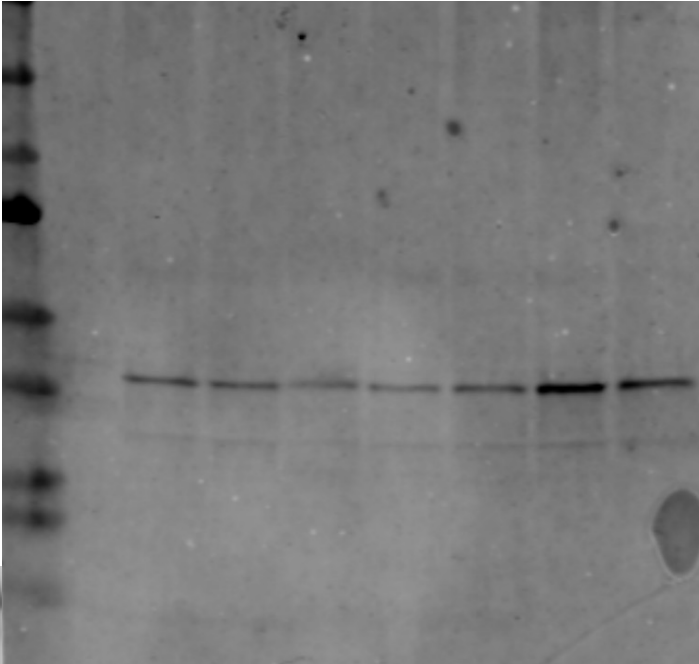

Anti-mCherry (MPC1)

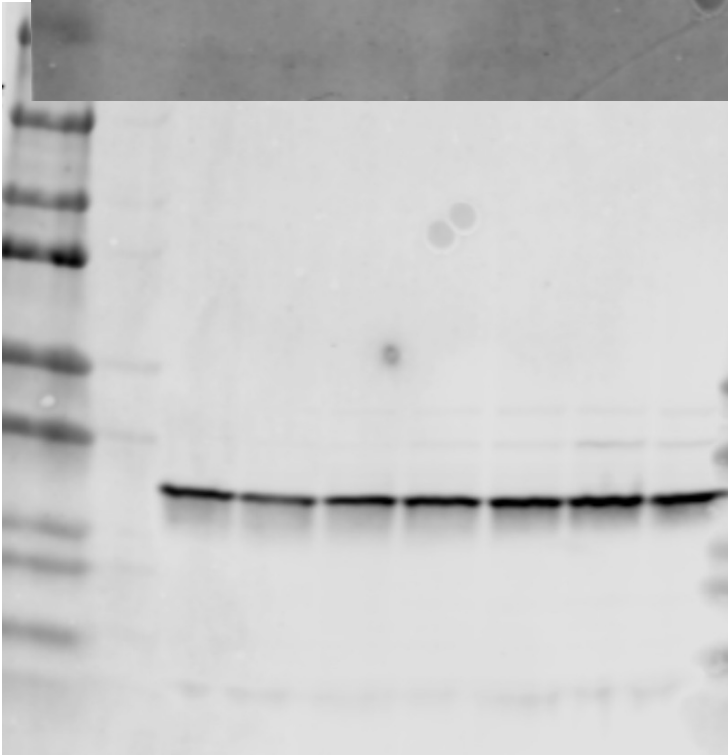

Anti-MPC2

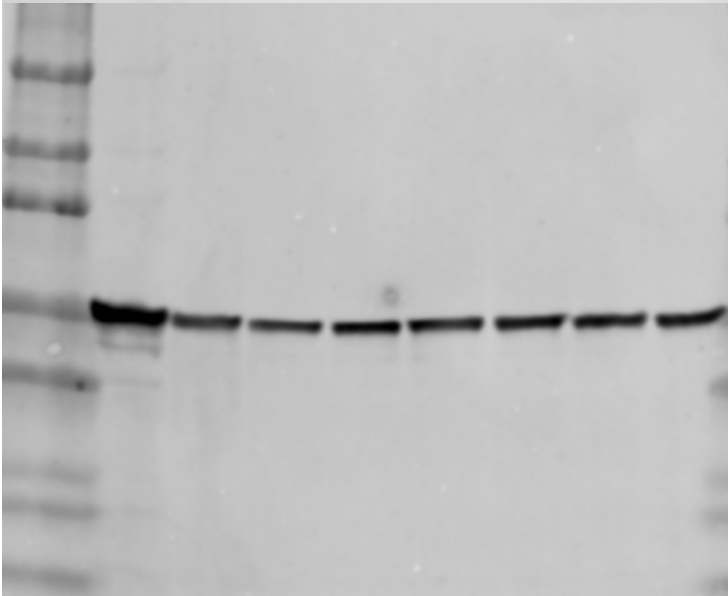

Anti-Tubulin

Full blot images for Figure 3

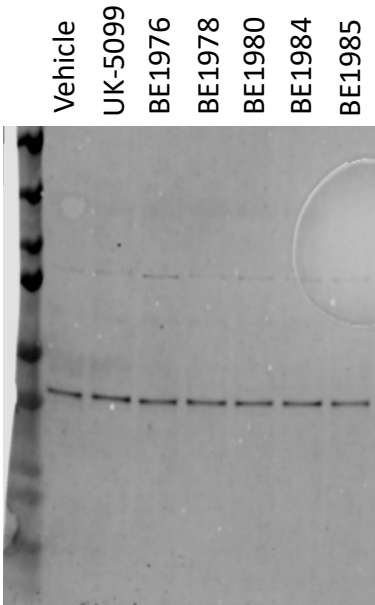

pPDH E1 $\alpha$ -S232

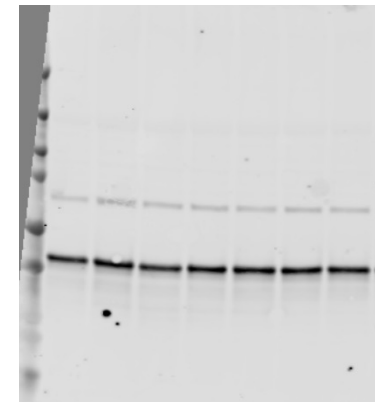

pPDH E1 $\alpha$ -S293

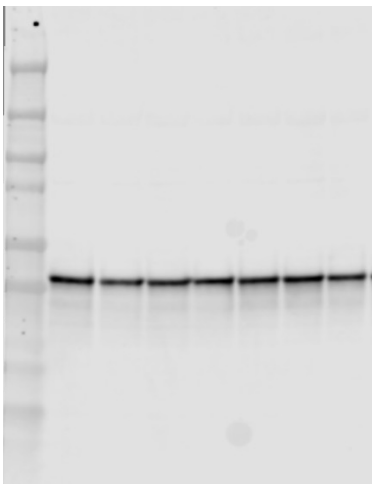

pPDH E1 $\alpha$ -S300

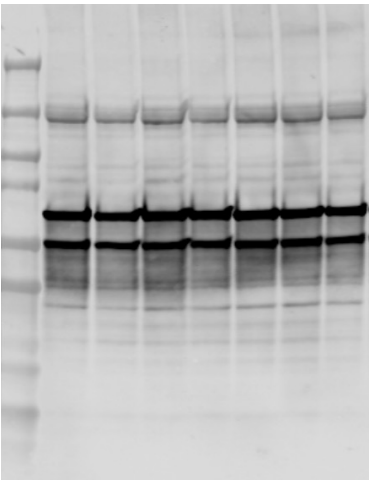

E2  
E3bp  
E1 $\alpha$   
E1 $\beta$  PDH Complex

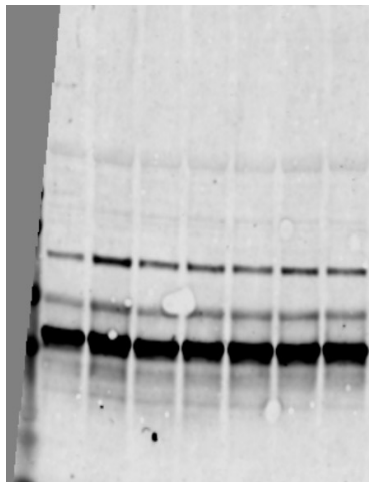

Tubulin
